# Supplementary material
Source: HighWire-hosted journal article supplement (https://bmjopen.bmj.com/content/7/9/e017848)

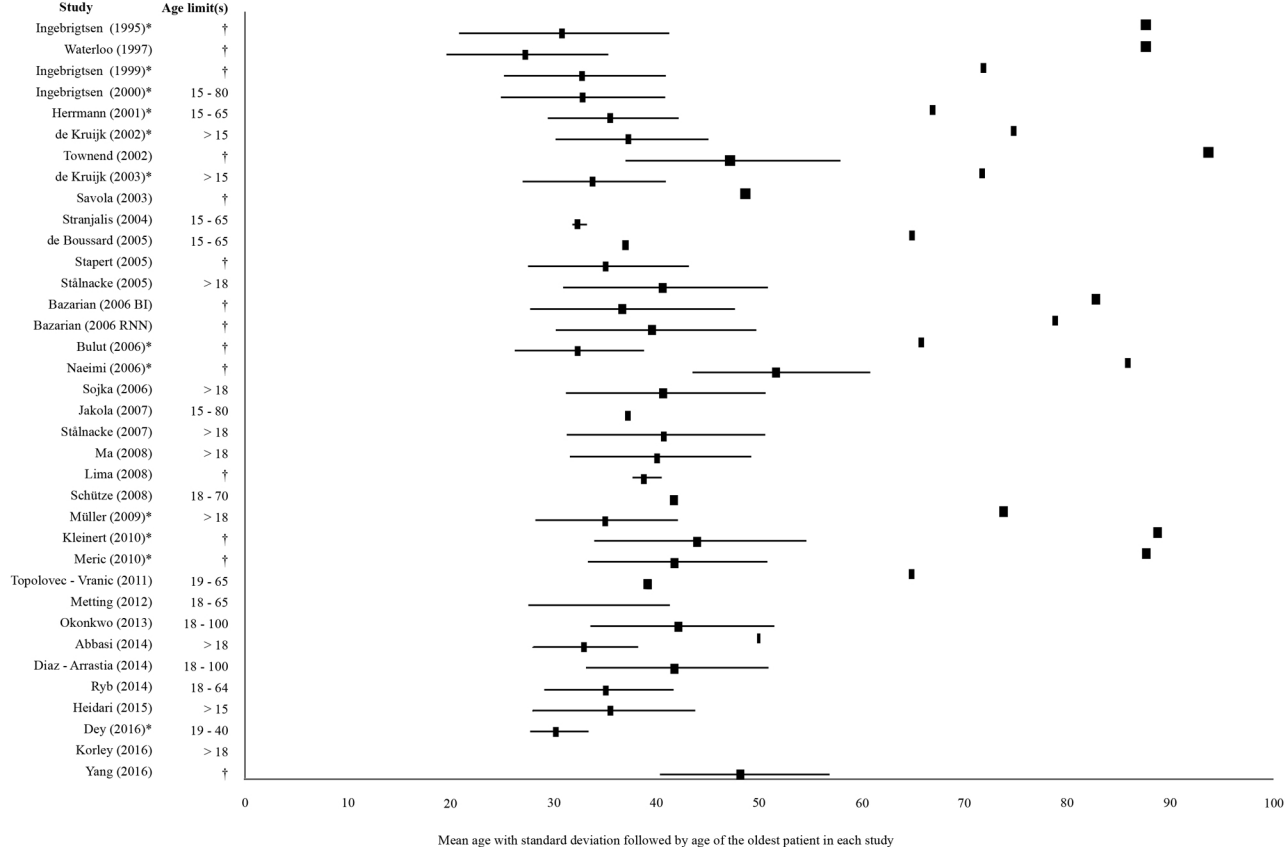

† None specified

\* Mean age and standard deviation were estimated using formulas in Hozo et al.

Supplement: inline-supplementary-material-4 [file inline-supplementary-material-4.pdf]
